# Supplementary material
Source: MDPI journal article supplement (https://www.mdpi.com/2304-6740/6/1/29)
Supplement: s1 [file s1]

# 1 Density of Structure plots at 100K for CaO, SrO, BaO

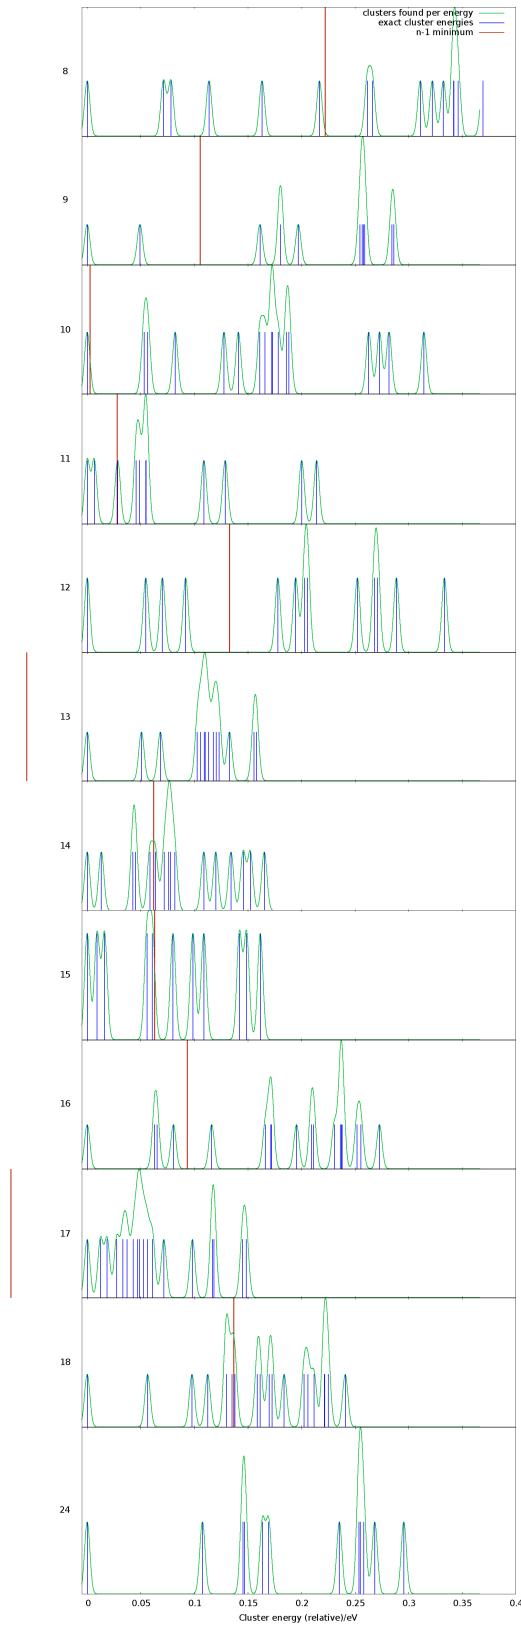

Figure S1: Density of structures for CaO at  $T = 100\text{K}$ . Blue impulses indicate LM energies (per formula unit), green curves are thermally smeared energies indicating overlap of different structures, red impulses indicate the  $n - 1$  local minimum.

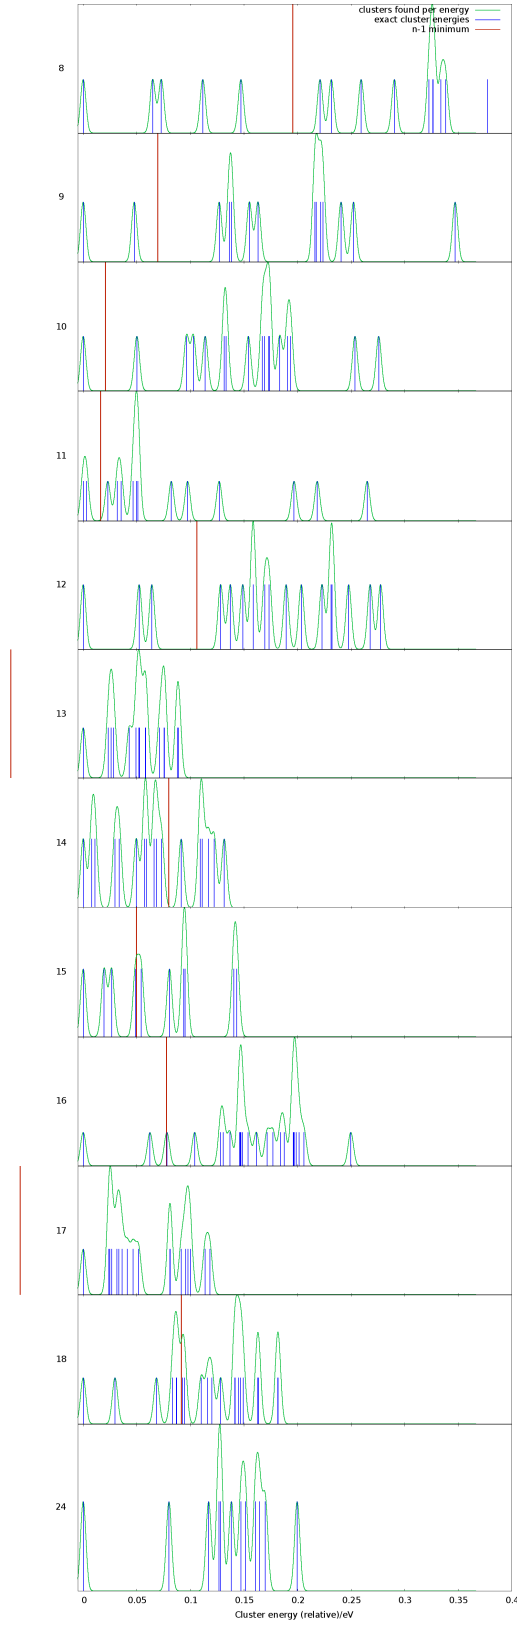

Figure S2: Density of structures for SrO at  $T = 100\text{K}$ . Blue impulses indicate LM energies (per formula unit), green curves are thermally smeared energies indicating overlap of different structures, red impulses indicate the  $n - 1$  local minimum.

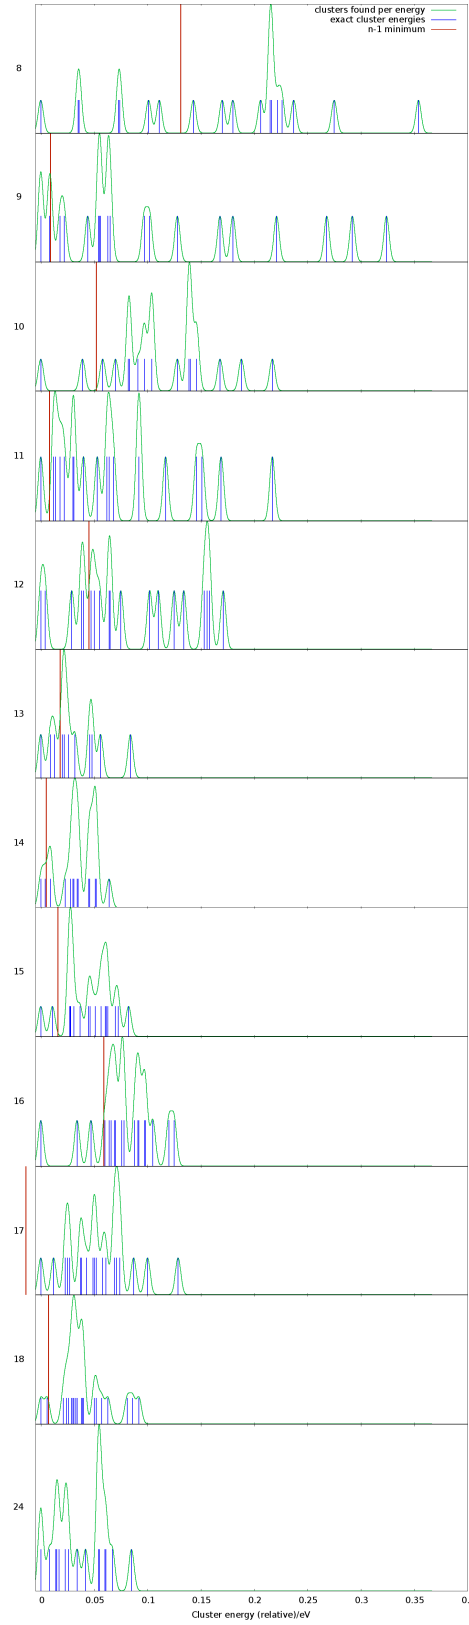

Figure S3: Density of structures for BaO at  $T = 100\text{K}$ . Blue impulses indicate LM energies (per formula unit), green curves are thermally smeared energies indicating overlap of different structures, red impulses indicate the  $n - 1$  local minimum.

## 2 Density of Structures at 300K for MgO, CaO, SrO, BaO

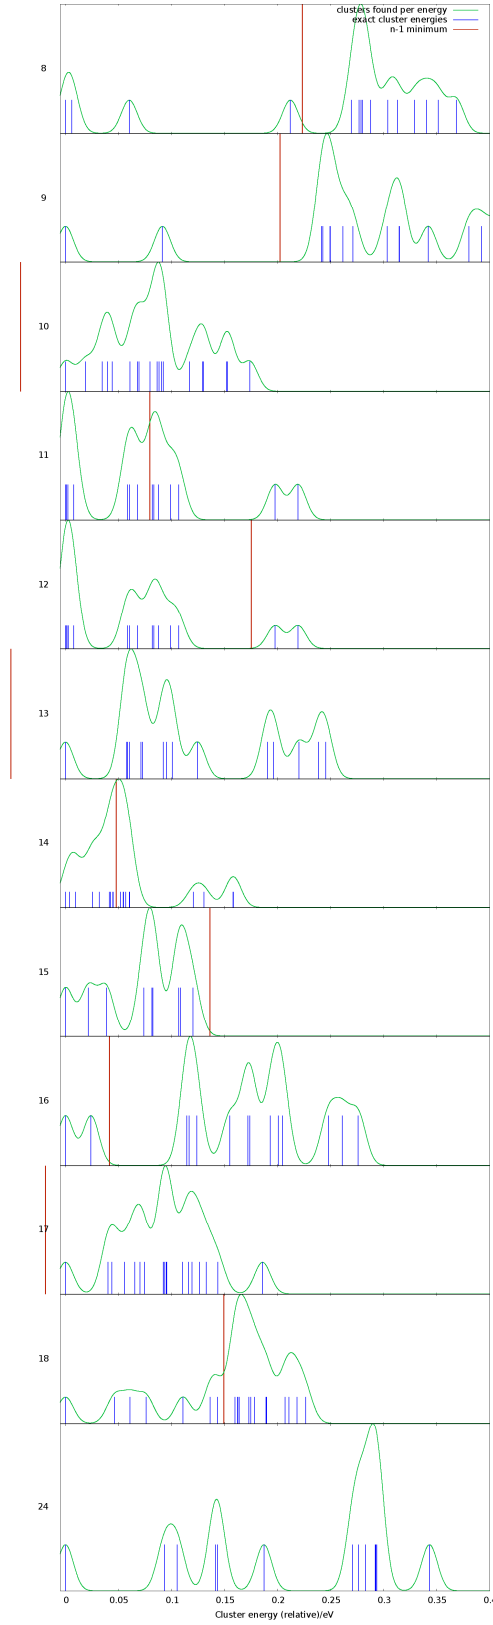

Figure S4: Density of structures for MgO at  $T = 300\text{K}$ . Blue impulses indicate LM energies (per formula unit), green curves are thermally smeared energies indicating overlap of different structures, red impulses indicate the  $n - 1$  local minimum.

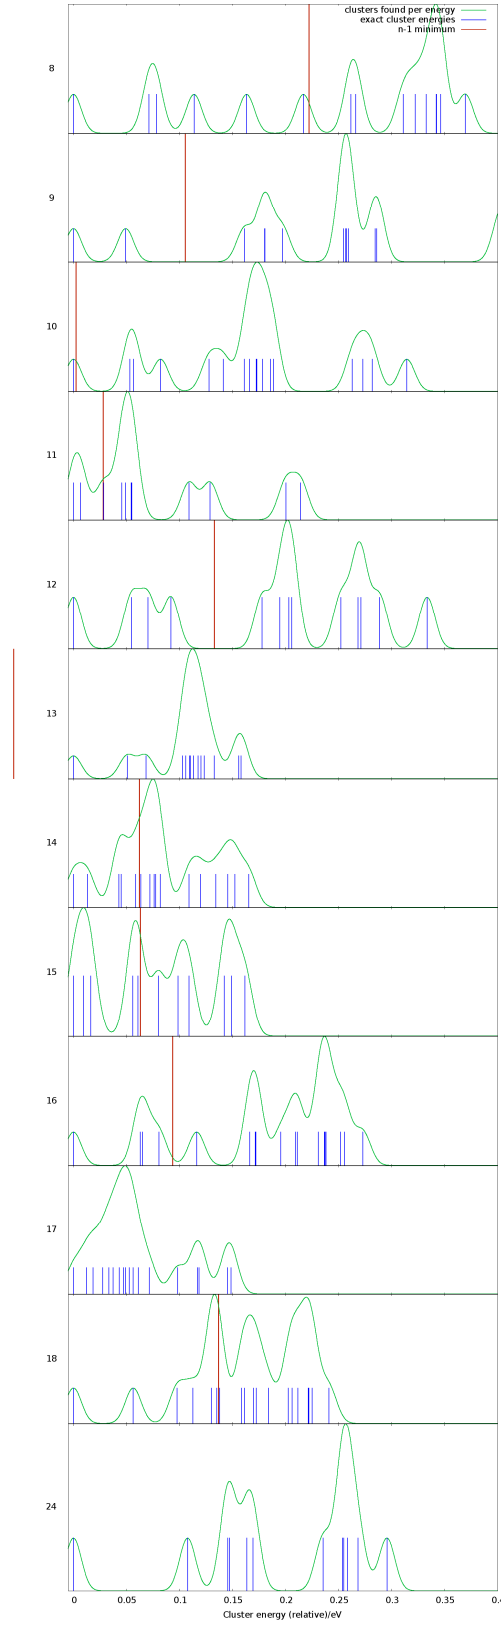

Figure S5: Density of structures for CaO at  $T = 300\text{K}$ . Blue impulses indicate LM energies (per formula unit), green curves are thermally smeared energies indicating overlap of different structures, red impulses indicate the  $n - 1$  local minimum.

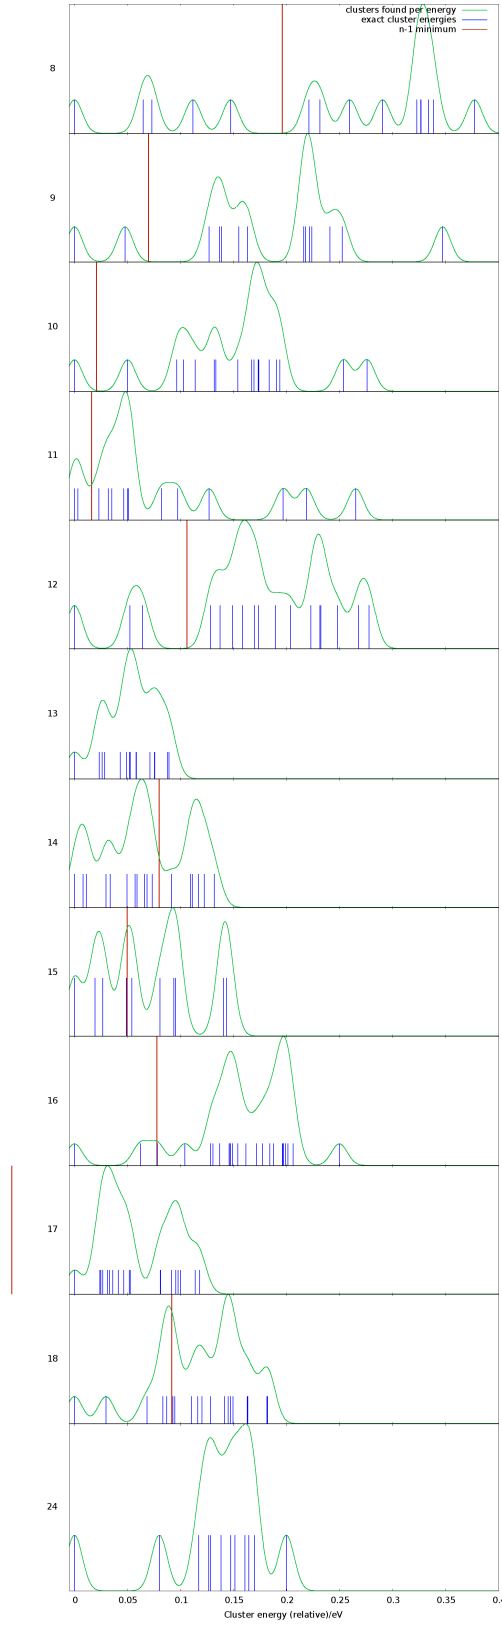

Figure S6: Density of structures for SrO at  $T = 300\text{K}$ . Blue impulses indicate LM energies (per formula unit), green curves are thermally smeared energies indicating overlap of different structures, red impulses indicate the  $n - 1$  local minimum.

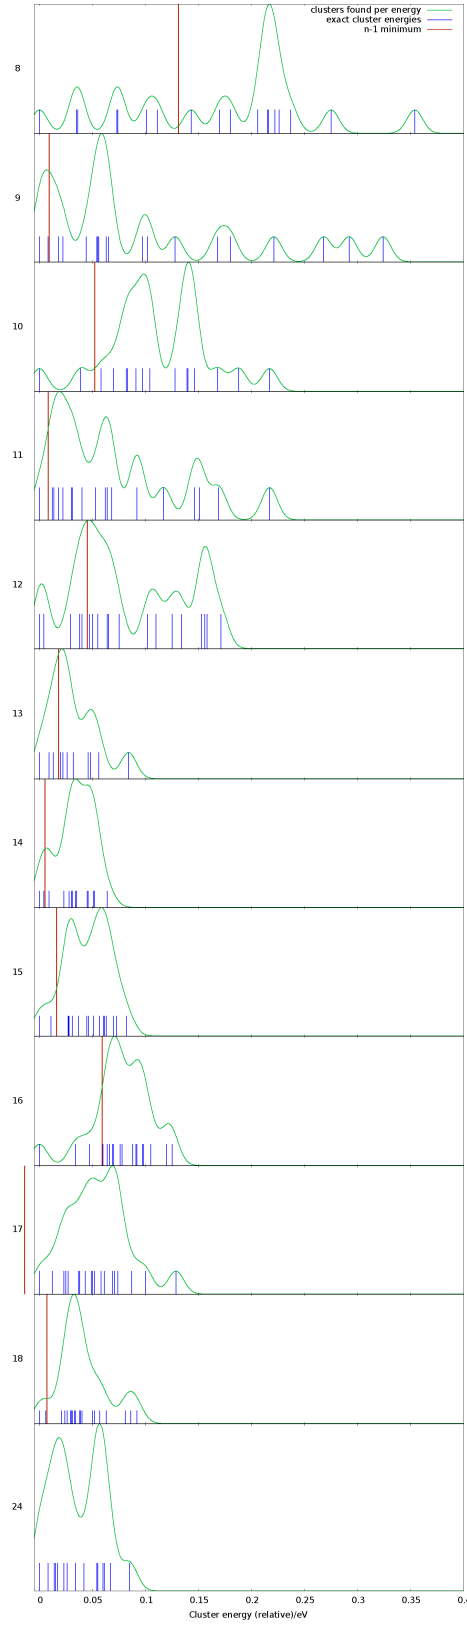

Figure S7: Density of structures for BaO at  $T = 300\text{K}$ . Blue impulses indicate LM energies (per formula unit), green curves are thermally smeared energies indicating overlap of different structures, red impulses indicate the  $n - 1$  local minimum.
